# Supplementary material for: Allelopathic Activity of a Novel Compound, Two Known Sesquiterpenes, and a C13 Nor-Isopenoid from the Leave of Croton oblongifolius Roxb. for Weed Control
Source: MDPI journal article supplement (doi:10.3390/plants12193384), 2023-09-25
Supplement: s1 [file s1]

221215TJ6172 #39 RT: 0.29 AV: 1 NL: 8.81E7  
T: FTMS + p ESI Full ms [100.0000-300.0000]

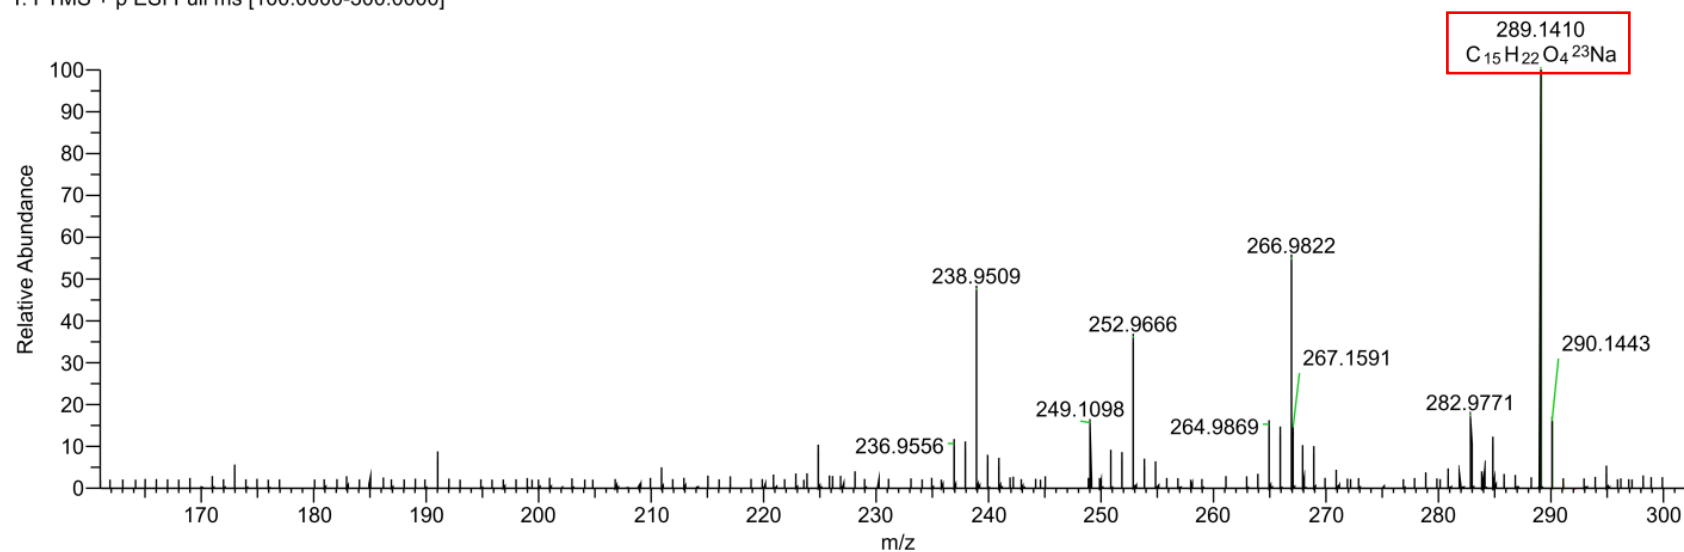

Figure S1. Full spectrum of ESIMS analysis of compound II

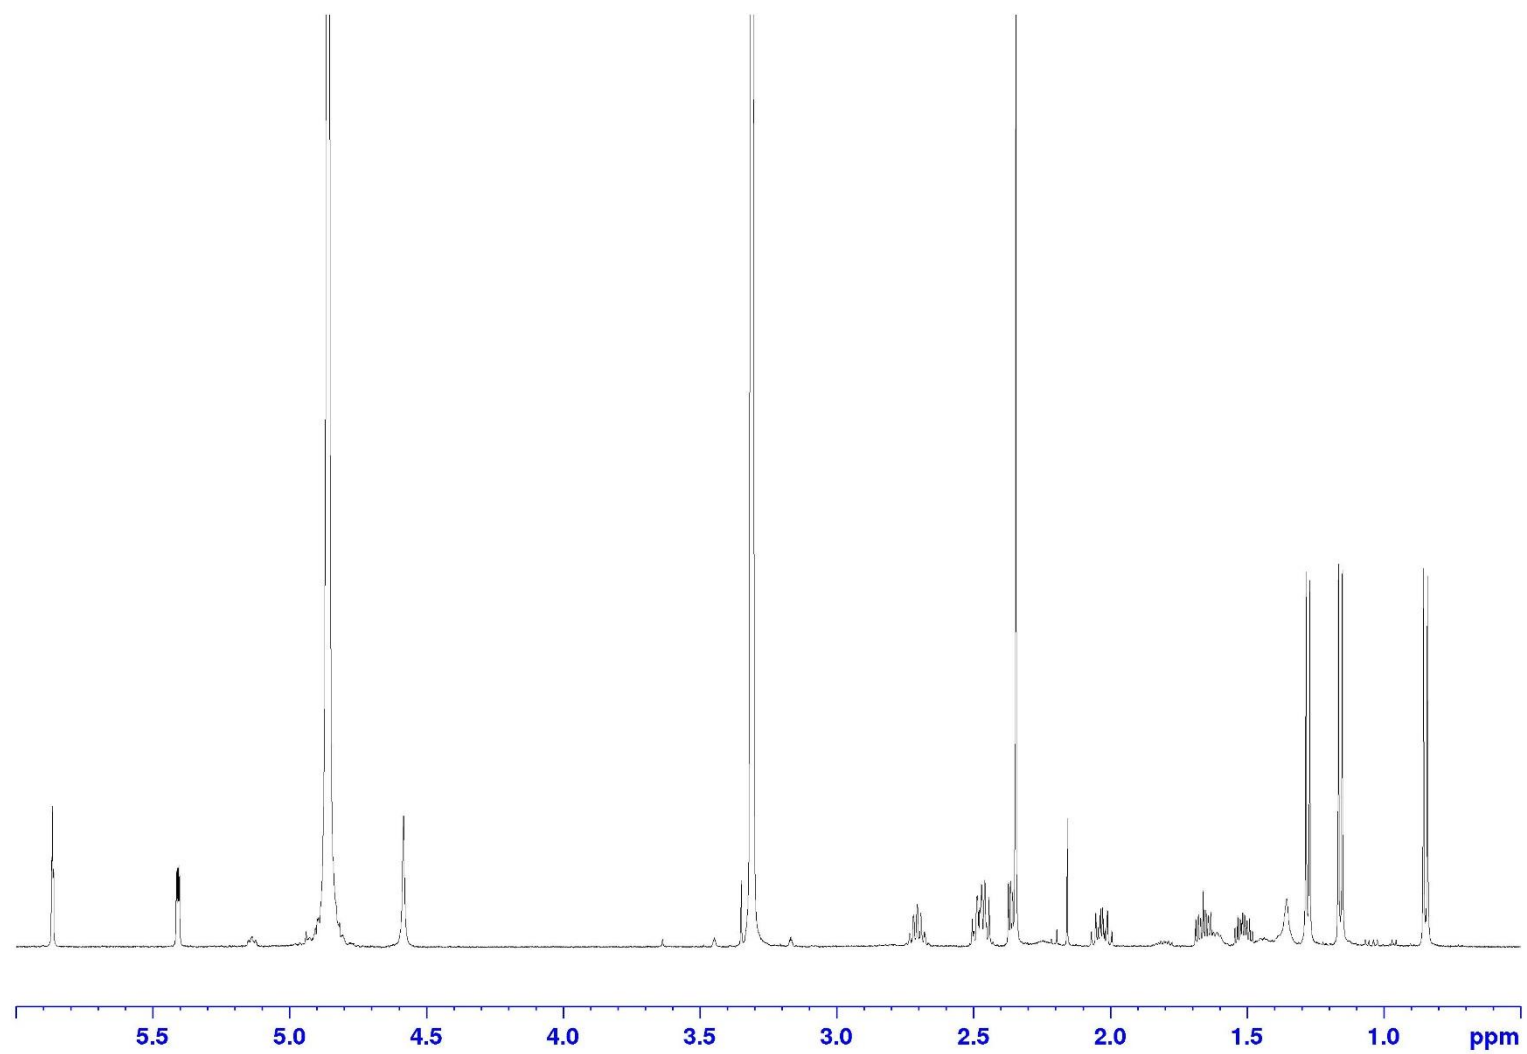

Figure S2.  $^1\text{H}$  NMR spectrum of compound II in  $\text{CD}_3\text{OD}$  (500 MHz)

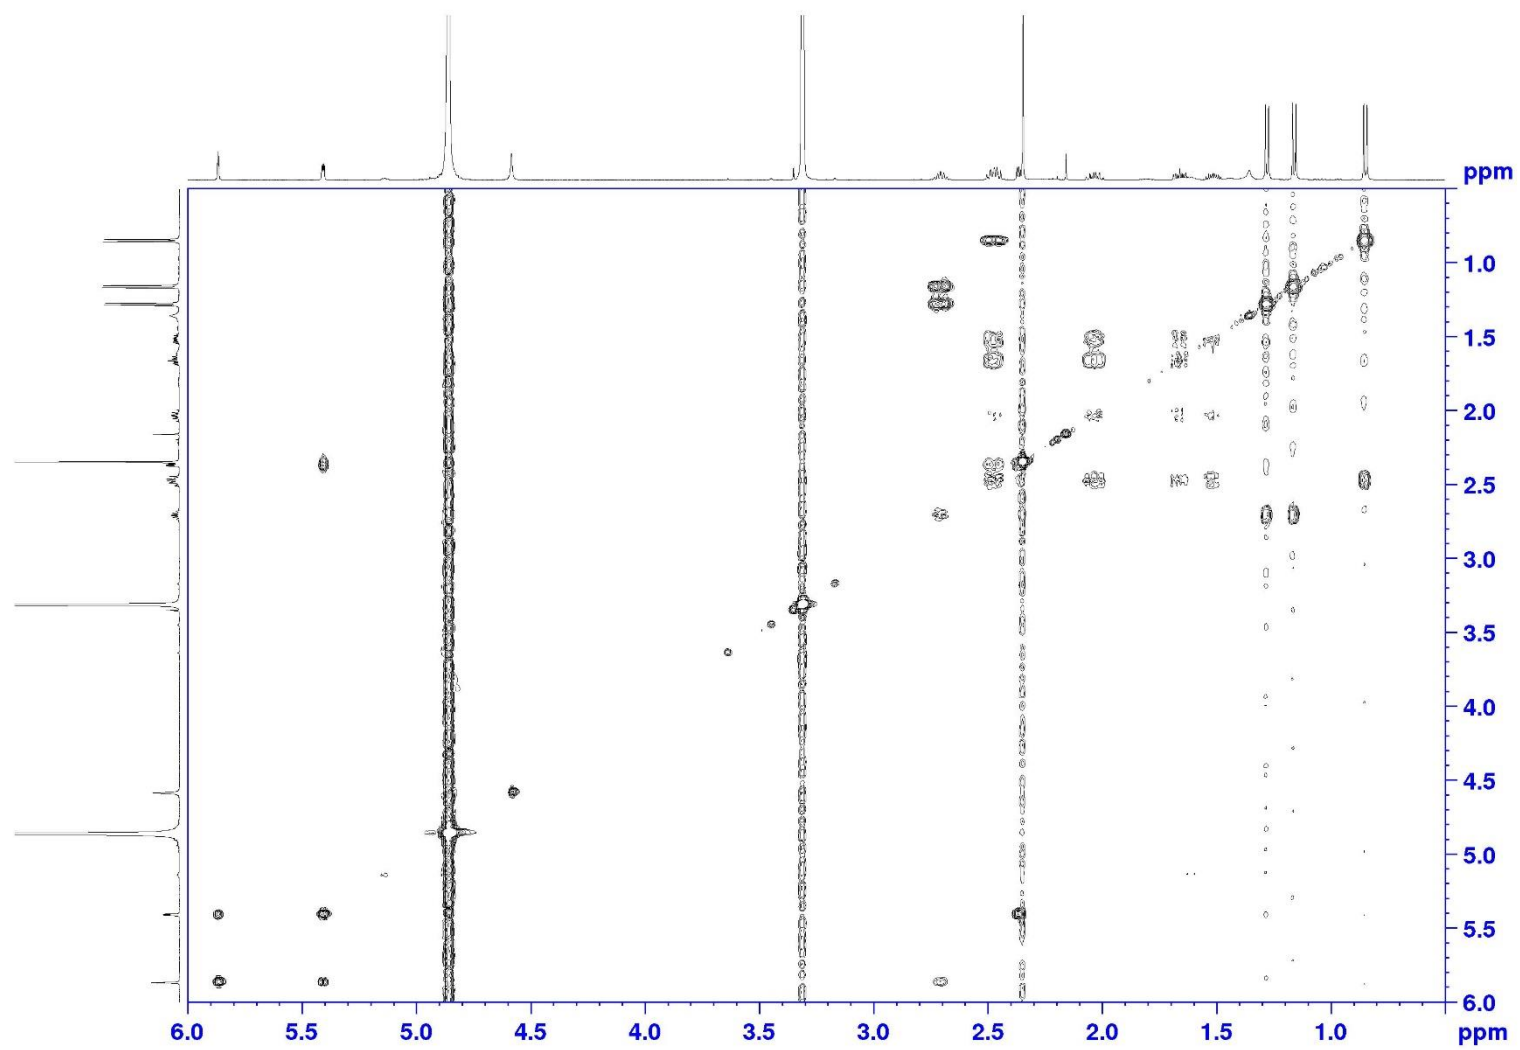

Figure S3. COSY spectrum of compound II in CD<sub>3</sub>OD (500 MHz)

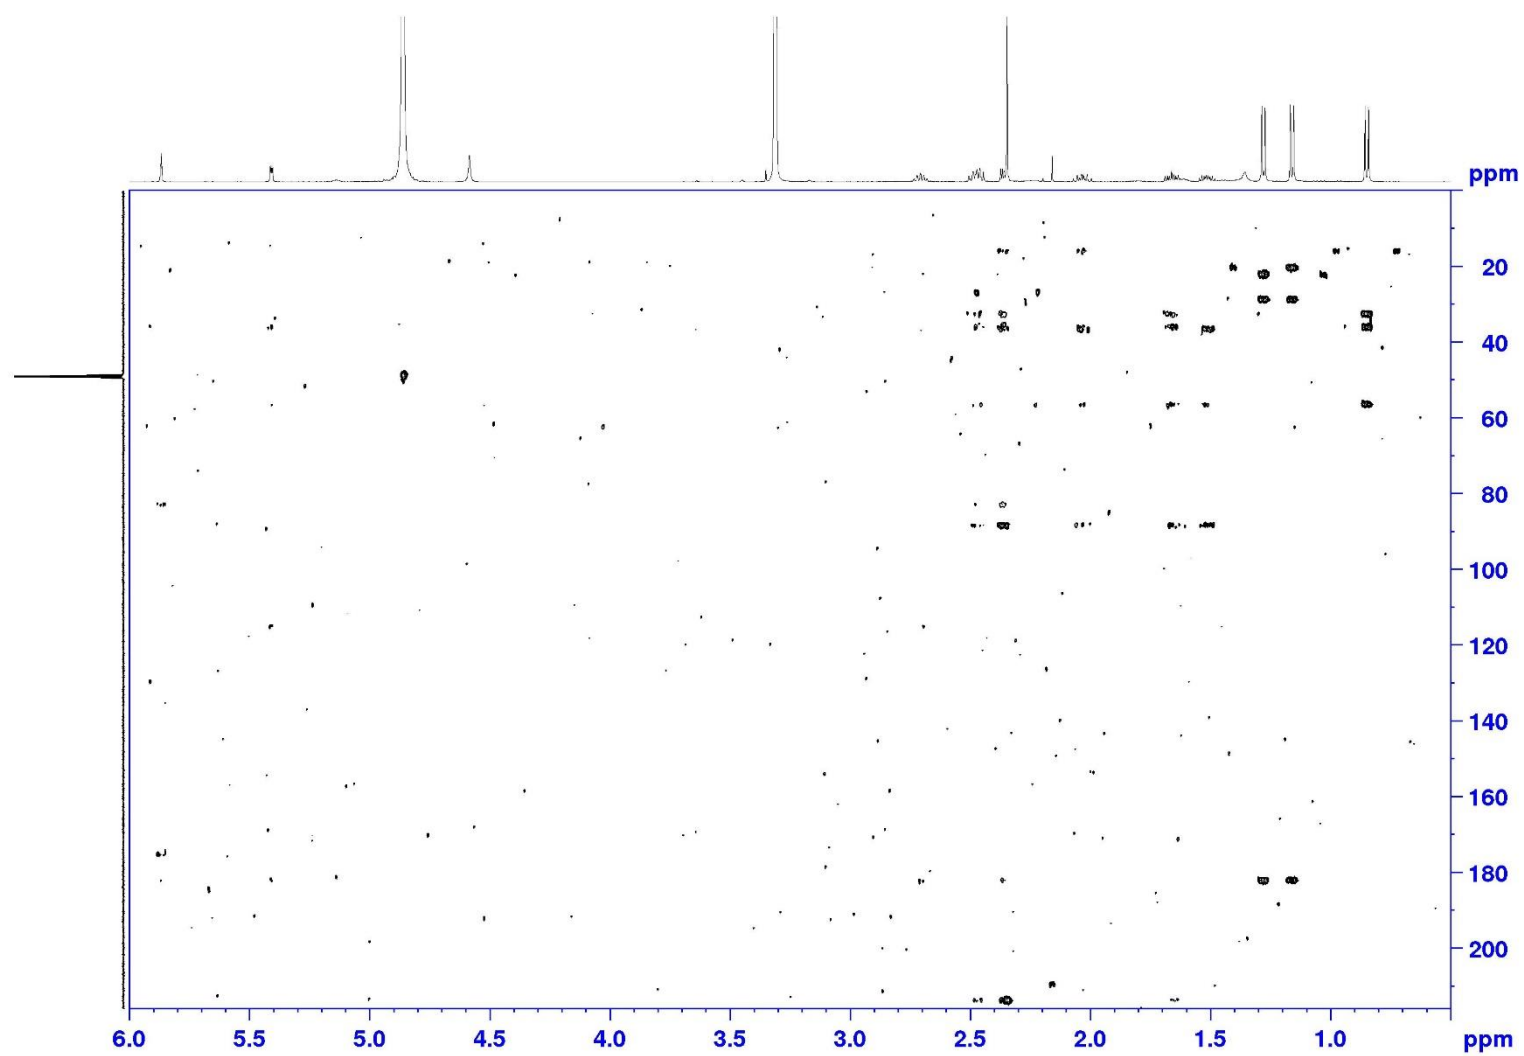

Figure S4. HMBC spectrum of compound II in  $\text{CD}_3\text{OD}$  (500 MHz)

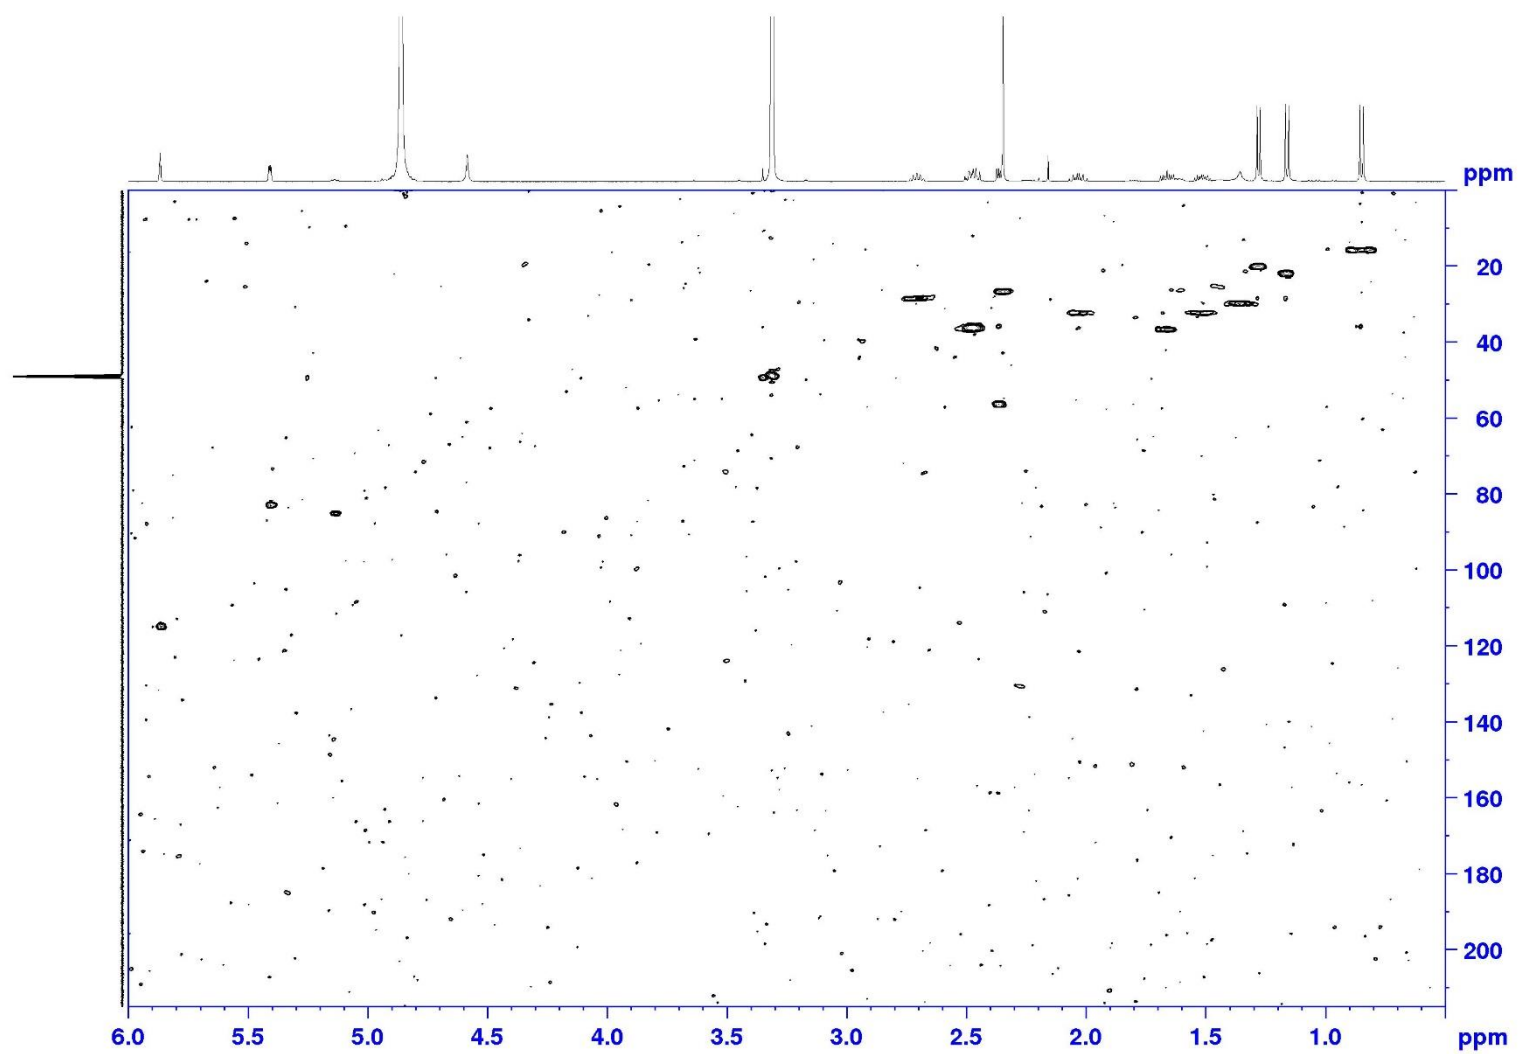

Figure S5. HSQC spectrum of compound II in CD<sub>3</sub>OD (500 MHz)
